# Supplementary material for: Environmentally responsive histidine–carboxylate zipper formation between proteins and nanoparticles
Source: Royal Society of Chemistry journal article supplement (doi:10.1039/c4nr02097a), 2014-01-01
Supplement: c4nr02097a1.pdf [file c4nr02097a1.pdf]

Supplementary information for

## Environmentally Responsive Histidine-Carboxylate Zipper Formation between Proteins and Nanoparticles

Rubul Mout, Gulen Yesilbag Tonga, Moumita Ray, Daniel F. Moyano and Vincent M. Rotello\*

Supporting figures:

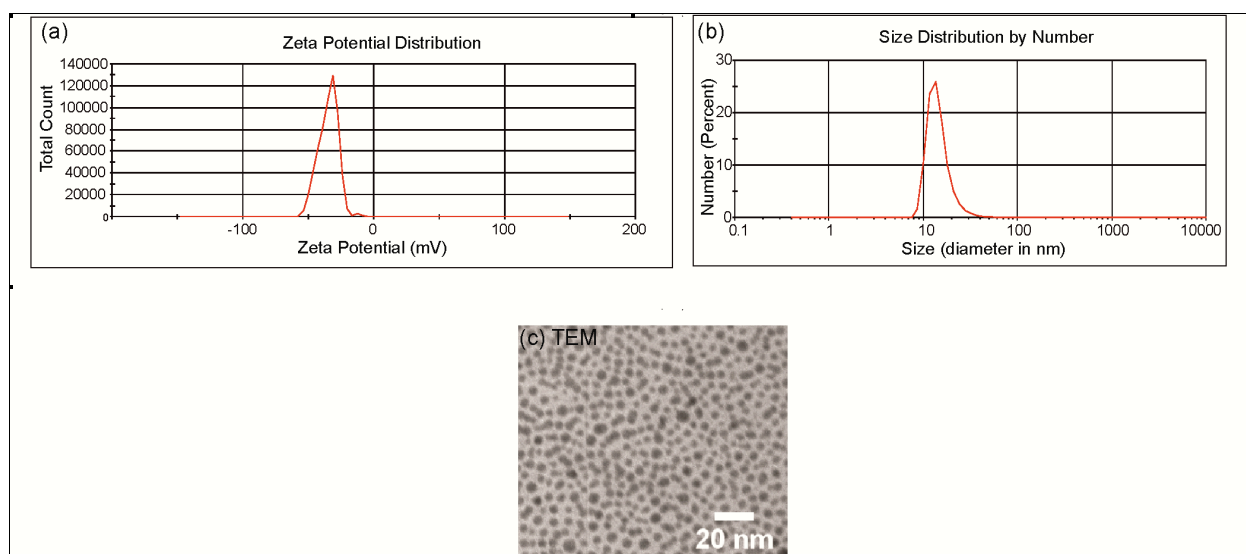

**Fig. S1** Characterization of AuNP-COOH. (a) Zeta potential ( $-34.8 \pm 3.1$  mV, measured at 5 mM PB, pH 7.4), (b) Dynamic light scattering (DLS) diameter ( $14.1 \pm 1.2$  nm, measured at 5 mM PB, pH 7.4), and (c) TEM image of AuNP-COOH.

**EGFP protein sequence<sup>1</sup>:**

```
MVSKGEELFTGVVPILVELDGDVNGHKFSVSGEGEGDATYGKLT LKFICTTGKLPVPWPTLVTTFTYGVQCFSRYPDH  
MKQHDFFKSAMPEGYVQERTIFFKDDGNYKTRAEVKFEGDTLVNRIELKGIDFKEDGNILGHKLEYNYNSHNVYIMAD  
KQKNGIKVNFKIRHNIEDGSVQLADHYQQNTPIGDGPVLLPDNHYLSTQSALS KDPNEKRDHMLLEFVTAAGITHGM  
DELYK
```

1 B. P. Cormack, R. H. Valdivia and S. Falkow, *Gene*, 1996, **173**, 33.
